# Supplementary material for: Nucleoside-based fluorescent carbon dots for discrimination of metal ions
Source: Royal Society of Chemistry journal article supplement (doi:10.1039/c9tb02758k), 2020-01-01
Supplement: c9tb02758k1.pdf [file c9tb02758k1.pdf]

## Electronic Supplementary Information

### Nucleoside-based fluorescent carbon dots for discrimination of metal ions

Tieli Zhou<sup>a,b</sup>, Jinyi Zhang<sup>b</sup>, Biwu Liu<sup>b</sup>, Shihong Wu<sup>c</sup>, Peng Wu<sup>c</sup> and Juewen Liu<sup>b,\*</sup>

<sup>a</sup>Food Science and Engineering, Changchun University, 8326 Satellite Road, Changchun, 130012, Jilin, China

<sup>b</sup>Department of Chemistry, Waterloo Institute for Nanotechnology, University of Waterloo, Waterloo, Ontario, N2L 3G1, Canada

<sup>c</sup> Analytical & Testing Center, College of Chemistry, State Key Laboratory of Hydraulics and Mountain River Engineering, Sichuan University, 610064, Chengdu, China

Email: liujw@uwaterloo.ca

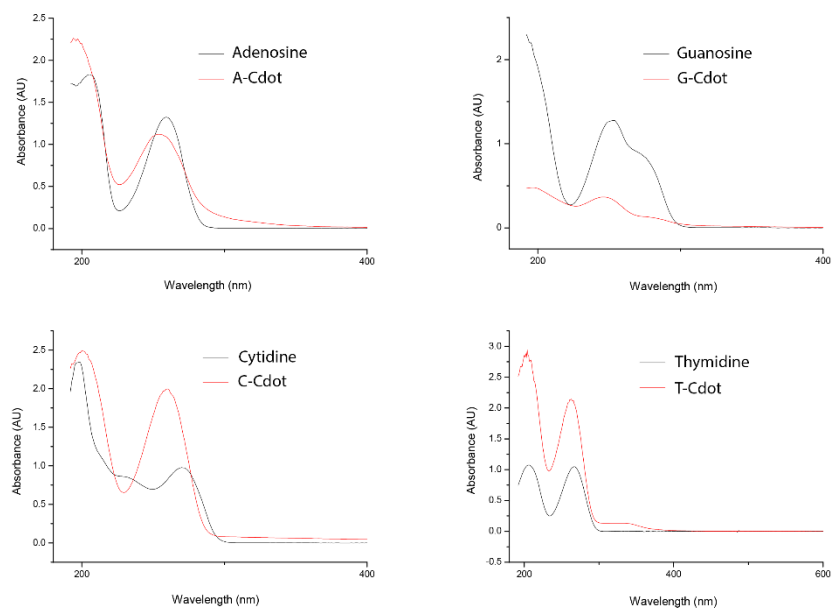

**Figure S1.** UV-vis spectra of the four nucleoside monomers and the resulting C-dots.
